# Supplementary material for: Network meta-analysis of four kinds of traditional Chinese exercise therapy in the treatment of type 2 diabetes: protocol for a systematic review
Source: PubMed Central journal article supplement — BMJ Open. 2021 Jul 9;11(7):e048259. doi: 10.1136/bmjopen-2020-048259 (PMC8273459; doi:10.1136/bmjopen-2020-048259), 2021-07-09
Supplement: bmjopen-2020-048259.draft_revisions.pdf [file bmjopen-2020-048259.draft_revisions.pdf]

# BMJ Open

BMJ Open is committed to open peer review. As part of this commitment we make the peer review history of every article we publish publicly available.

When an article is published we post the peer reviewers' comments and the authors' responses online. We also post the versions of the paper that were used during peer review. These are the versions that the peer review comments apply to.

The versions of the paper that follow are the versions that were submitted during the peer review process. They are not the versions of record or the final published versions. They should not be cited or distributed as the published version of this manuscript.

BMJ Open is an open access journal and the full, final, typeset and author-corrected version of record of the manuscript is available on our site with no access controls, subscription charges or pay-per-view fees (<http://bmjopen.bmj.com>).

If you have any questions on BMJ Open's open peer review process please email [info.bmjopen@bmj.com](mailto:info.bmjopen@bmj.com)

# BMJ Open

## Network meta-analysis of four kinds of traditional Chinese exercise therapy in the treatment of type 2 diabetes: protocol for a systematic review

|                               |                                                                                                                                                                                                                                                |
|-------------------------------|------------------------------------------------------------------------------------------------------------------------------------------------------------------------------------------------------------------------------------------------|
| Journal:                      | <i>BMJ Open</i>                                                                                                                                                                                                                                |
| Manuscript ID                 | bmjopen-2020-048259                                                                                                                                                                                                                            |
| Article Type:                 | Protocol                                                                                                                                                                                                                                       |
| Date Submitted by the Author: | 22-Dec-2020                                                                                                                                                                                                                                    |
| Complete List of Authors:     | jia, yuqi; Shandong University of Traditional Chinese Medicine, yu, ying; Shandong University of Traditional Chinese Medicine, College of Traditional Chinese Medicine<br>Huang, Hailiang; Shandong University of Traditional Chinese Medicine |
| Keywords:                     | General diabetes < DIABETES & ENDOCRINOLOGY, Protocols & guidelines < HEALTH SERVICES ADMINISTRATION & MANAGEMENT, SPORTS MEDICINE, REHABILITATION MEDICINE                                                                                    |
|                               |                                                                                                                                                                                                                                                |

SCHOLARONE™  
Manuscripts

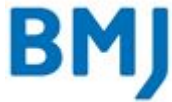

I, the Submitting Author has the right to grant and does grant on behalf of all authors of the Work (as defined in the below author licence), an exclusive licence and/or a non-exclusive licence for contributions from authors who are: i) UK Crown employees; ii) where BMJ has agreed a CC-BY licence shall apply, and/or iii) in accordance with the terms applicable for US Federal Government officers or employees acting as part of their official duties; on a worldwide, perpetual, irrevocable, royalty-free basis to BMJ Publishing Group Ltd ("BMJ") its licensees and where the relevant Journal is co-owned by BMJ to the co-owners of the Journal, to publish the Work in this journal and any other BMJ products and to exploit all rights, as set out in our [licence](#).

The Submitting Author accepts and understands that any supply made under these terms is made by BMJ to the Submitting Author unless you are acting as an employee on behalf of your employer or a postgraduate student of an affiliated institution which is paying any applicable article publishing charge ("APC") for Open Access articles. Where the Submitting Author wishes to make the Work available on an Open Access basis (and intends to pay the relevant APC), the terms of reuse of such Open Access shall be governed by a Creative Commons licence – details of these licences and which [Creative Commons](#) licence will apply to this Work are set out in our licence referred to above.

Other than as permitted in any relevant BMJ Author's Self Archiving Policies, I confirm this Work has not been accepted for publication elsewhere, is not being considered for publication elsewhere and does not duplicate material already published. I confirm all authors consent to publication of this Work and authorise the granting of this licence.

# Network meta-analysis of four kinds of traditional Chinese exercise therapy in the treatment of type 2 diabetes: protocol for a systematic review

Yuqi Jia,<sup>1</sup> Ying Yu,<sup>1</sup> Hailiang Huang,<sup>1</sup>

<sup>1</sup> Shandong University of Traditional Chinese Medicine, Jinan, China

Correspondence to: Professor Hailiang Huang; huanghailiang@sducm.edu.cn

## ABSTRACT

**Introduction:** Traditional Chinese exercise therapy, as one of the commonly used exercise interventions for the treatment of type 2 diabetes patients in China, has been proven effective by many clinical practices, but there is still a lack of evidence-based research. This study aims to integrate clinical randomized controlled correlations via network meta-analysis evidence.

**Methods and analysis:** The comprehensive search included Chinese and other language databases such as the MEDLINE (PubMed), Web of Science, Excerpt Medica Database (EMBASE), The Cochrane Library, China National Knowledge Infrastructure (CNKI), Wanfang Data Knowledge Service Platform, China Scientific Journal Database (VIP), China Biomedical Literature Database (CBM). Clinical randomized controlled trials of four traditional Chinese exercise therapies in the treatment of type 2 diabetes, including Tai Chi, Ba Duan Jin, Yi Jin Jing, and Wu Qin Xi were retrieved. The search time was conducted from the establishment of the database to October 2020. Two researchers screened the documents that met the inclusion criteria, extracted data according to the pre-set table, and evaluated the methodological quality of the included studies according to the quality evaluation tools recommended by the Cochrane System Reviewer Manual Version 5.1. The R language and ADDIS statistical software were used to conduct statistics and analysis of intervention measures.

**Ethics and dissemination:** Since the NMA protocol has been approved by the local institutional review board and ethics committee, it does not involve private information, nor does it require further ethical approval or informed consent. We will complete this study according to the "Cochrane Intervention System Evaluation Manual" and the "System Evaluation and Network

1  
2  
3  
4  
5  
6  
7  
8  
9  
10  
11  
12  
13  
14  
15  
16  
17  
18  
19  
20  
21  
22  
23  
24  
25  
26  
27  
28  
29  
30  
31  
32  
33  
34  
35  
36  
37  
38  
39  
40  
41  
42  
43  
44  
45  
46  
47  
48  
49  
50  
51  
52  
53  
54  
55  
56  
57  
58  
59  
60

Meta-Analysis Program" (PRISMAP). According to the guidelines of the PRISMA NMA extended statement, a report on the further results of this research will be submitted.

**Trial registration number: PROSPERO** CRD42020214786

For peer review only

### Strengths and limitations of this study

- This study may provide the best possible exercise therapy options and reliable evidence-based medicine for the clinical treatment of type 2 diabetes.
- To a certain extent, may provide some new insights for the auxiliary treatment of type 2 diabetes by exercise therapy.
- This study also has some limitations, including publication bias, clinical heterogeneity and selection bias.

## INTRODUCTION

Type 2 diabetes (type 2 diabetes mellitus, T2DM), also known as non-insulin-dependent diabetes, is the most common form of clinical diabetes and mainly manifests as persistent hyperglycaemia. Its aetiology and pathogenesis are not yet clear, but the disease is mainly related to insulin secretion defects related to inflammation and metabolic stress, including the involvement of genetic factors.<sup>1</sup> The significant pathophysiological feature of type 2 diabetes is the decrease in insulin's ability to regulate glucose metabolism (insulin resistance) and the decrease (or relative decrease) in insulin secretion caused by defects in pancreatic islet B cell function.<sup>2</sup> As the natural course of the disease develops, the dependence on exogenous blood sugar control increases, which can affect multiple tissues and organs and can cause a variety of secondary complications.<sup>3</sup> The disease can affect the large blood vessels (cerebrovascular disease, cardiovascular disease), microvasculature (podiatry, eye disease, kidney disease) and nerves (nephropathy, eye disease),<sup>4</sup> reducing the quality of life of patients and endangering patients' lives.

With the improvement of living standards and changes in the human living environment, the incidence of T2DM is increasing.<sup>5</sup> At present, the main methods of blood sugar control in T2DM patients involve oral hypoglycaemic drugs and exogenous insulin supplements. Traditional treatment is highly dependent on drugs, and oral drugs and exogenous insulin can only temporarily maintain blood sugar or temporarily improve insulin sensitivity and are not curative.<sup>3</sup>

According to the latest version of the domestic guidelines for the prevention and treatment of type 2 diabetes (2017 edition), lifestyle intervention is the basic treatment measure for T2DM and is required for the treatment of diabetes; exercise plays an important role in the comprehensive

1  
2  
3  
4 management of T2DM patients.<sup>2</sup> According to the guidelines of the American College of Sports  
5  
6 Medicine and the American Diabetes Association, it is recommended that diabetic patients  
7  
8 perform aerobic exercise. Patients with type 2 diabetes should perform at least 150 minutes of  
9  
10 moderate- or higher-intensity exercise a week, and they should perform it at least 3 days a week.<sup>6</sup>  
11  
12 Long-term regular aerobic exercise can improve the body weight and blood sugar and blood lipid  
13  
14 levels of type 2 diabetes patients and has an important role in the rehabilitation of type 2 diabetes  
15  
16 and the prevention of complications.<sup>7</sup>

17  
18 Traditional Chinese exercise therapy conforms to the characteristics of low-intensity and  
19  
20 long-term aerobic exercise proposed by modern research. It is guided by the holistic concept of  
21  
22 Chinese medicine as the main theoretical guide. By mobilizing the human body's own potential, it  
23  
24 can achieve the purpose of healing and strengthening the body, preventing and curing diseases,  
25  
26 and it is a nondrug therapy for T2DM.<sup>8-9</sup> In recent years, a number of randomized controlled  
27  
28 studies have shown that four traditional exercise therapies play an irreplaceable role in the  
29  
30 prevention of T2DM at all levels. Studies have found that Tai Chi can reduce damage to  
31  
32 pancreatic islet cells by downregulating the expression of inflammatory cytokines, improving the  
33  
34 body's sensitivity to insulin, improving insulin resistance, delaying the occurrence of diabetes  
35  
36 complications, and improving the quality of life of patients with T2DM.<sup>10</sup> The application of  
37  
38 Baduanjin in high-risk populations for diabetes can delay the time of glucose metabolism  
39  
40 disorders, exert good stabilizing effects on blood sugar and glycosylated haemoglobin, and reduce  
41  
42 regulatory fluctuations.<sup>11</sup> Wuqinxi exercise can significantly improve the blood rheology of  
43  
44 patients with T2DM and improve blood circulation function.<sup>12</sup> Yijinjing can effectively regulate  
45  
46 liver and spleen function in patients with T2DM and can help improve blood sugar levels.<sup>13</sup>  
47  
48 At present, studies in this area mostly use randomized controlled trials to verify the clinical  
49  
50 efficacy of a single traditional exercise therapy on T2DM, and there is no evidence-based  
51  
52 evaluation that compares the clinical efficacy of four traditional exercise therapies for T2DM at  
53  
54 the same time. Therefore, this study selected four traditional exercise therapies commonly used in  
55  
56 clinical practice as the research objects and used the method of network meta-analysis to integrate  
57  
58 relevant clinical evidence. After summarizing different interventions in the same body of evidence,  
59  
60 a quantitative comprehensive statistical analysis was performed to compare the clinical efficacy of

1  
2  
3  
4 four different traditional Chinese exercise therapies in the treatment of T2DM. Our purpose is to  
5  
6 provide a reference for clinical treatment of T2DM to choose more effective exercise intervention  
7  
8 therapies.  
9

## 10 **METHODS AND ANALYSIS**

### 11 **Criteria**

#### 12 **Types of studies**

13  
14  
15  
16  
17  
18 The included literature type was randomized controlled trials (RCT), and there were no  
19  
20 restrictions regarding the type of language, whether blinding was used, or the requirements for  
21  
22 allocation concealment. Most of the clinical trial reports in this study were from mainland China.  
23  
24 As long as the included studies were approved by the local institution, we included the study in the  
25  
26 scope of the study and registered it in the international database.  
27

#### 28 **Type of participants**

29  
30  
31  
32 The patients all had type 2 diabetes, regardless of age, sex, and race. The diagnostic criteria used  
33  
34 for diabetes should comply with the "China Type 2 Diabetes Guidelines (2010 Edition)",<sup>14</sup> "China  
35  
36 Type 2 Diabetes Prevention Guidelines (2013 Edition)",<sup>15</sup> "China Type 2 Diabetes Prevention  
37  
38 Guidelines (2017 Edition)",<sup>2</sup> "Diagnostic Guidelines for Diabetes Diagnosis and Classification  
39  
40 Standards Revised by WHO in 1997"<sup>16</sup> and "Diagnostic Standards for Diabetes Made by WHO in  
41  
42 1999".  
43

#### 44 **Types of interventions and comparators**

45  
46  
47  
48 The control group received conventional basic treatment (e.g., hyperglycaemic treatment, health  
49  
50 education, voluntary exercise) without exercise intervention. The treatment group was treated with  
51  
52 one of the four traditional exercise therapies when the diagnostic criteria, curative effect  
53  
54 evaluation criteria, and basic treatment were the same.  
55

#### 56 **Types of outcomes**

57  
58  
59  
60 The predetermined main outcomes indicators were as follows: (a) blood glucose, including fasting  
blood glucose (FBG, FPG), 2-h postprandial blood glucose (2 hPG, PPG), and glycosylated



haemoglobin (GHb, HbA1c); (b) blood lipids, including total cholesterol (TC) and triglycerides (TG), high-density lipoprotein (HDL-C), and low-density lipoprotein (LDL-C).

Secondary outcomes indicators included: (a) body mass index BMI; (b) hemorheology indicators (whole blood low shear viscosity, whole blood high shear viscosity, plasma viscosity, haematocrit, erythrocyte sedimentation rate, red blood cell aggregation index, Fib, sICAM, and Ps); (c) quality of life evaluations, including the quality of life specific scale (DSQL) or SF-36 scale evaluations.

## Search methods for identification of studies

### Information sources

A computer was used to conduct a comprehensive search for 4 traditional randomized controlled trials (RCTs) for the treatment of type 2 diabetes. The search time was from the establishment of the database to October 2020. Computer databases searched included PubMed, Web of Science, EMBASE, The Cochrane Library, China Knowledge Network (CNKI), Wanfang Data Knowledge Service Platform, VIP.com (VIP), and China Biomedical Literature Database (CBM). Chinese search terms included Tai Chi, Ba Duan Jin, Yi Jin Jing, Wu Qin Xi, traditional exercises, Health Qigong, type 2 diabetes, and random, etc. English search terms included Tai Chi, Ba Duan Jin, Yi Jin Jing, Wu Qin Xi, Traditional Exercises, Health Qigong, Type 2 Diabetes, and Random, etc.

In addition, relevant references were tracked in the literature, and the corresponding authors were contacted when a complete report could not be obtained or when documents included incomplete relevant data. The best effort was made to ensure the comprehensiveness of the preliminary search work so as not to lose valuable research data. Example PubMed search strategies are shown in Table 1, and the terms matched the medical topic titles. According to the search modes of different databases, keywords could be combined with free words for a comprehensive search.

| Table 1 Search strategy used in PubMed database. |                                          |
|--------------------------------------------------|------------------------------------------|
| Number                                           | Search Terms                             |
| 1                                                | Search "Diabetes Mellitus, Type 2"[Mesh] |



1  
2  
3  
4 independently, extracted data according to a predetermined table, conducted cross-checking and  
5  
6 review, recorded the reasons for each excluded study, and invited third-party experts to discuss  
7  
8 and research different opinions to make the final decision. The PRISMA flowchart selected for  
9  
10 this process is shown in Figure 1.<sup>17-18</sup>

11  
12 The data extraction content included the basic information of the included literature (including the  
13  
14 first author, published journal and year, research topic); the relevant information of the  
15  
16 experimental group and the control group in the literature (including the number of cases, disease  
17  
18 course, age, intervention measures, treatment course, and outcome indicators); the design type and  
19  
20 the quality evaluation information of the included literature (e.g., random method, blind method,  
21  
22 allocation concealment, completeness of outcome data, selective reporting results, other sources of  
23  
24 bias).

### 25 26 **Study quality evaluation**

27  
28  
29 According to the quality evaluation standards of the Cochrane System Review Manual, RevMan  
30  
31 quality evaluation tools were used to evaluate the methodological quality of the included studies,  
32  
33 including random methods, allocation concealment, blinding, completeness of outcome data,  
34  
35 selective reporting results, and other sources of bias. Each project was divided into three types of  
36  
37 results: high risk, low risk and uncertainty risk. Based on the above descriptions, the two  
38  
39 researchers conducted individual induction studies and completed the quality evaluation results of  
40  
41 the included literature. If the results were different, third-party experts were invited to help discuss  
42  
43 and explain the quality evaluation. Cochrane's standard manual was used for literature quality  
44  
45 evaluation and bias risk assessment.<sup>19-20</sup>

### 46 47 **Data synthesis and statistical methods**

#### 48 49 **Pairwise and network meta-analysis**

50  
51  
52 First, the author used RevMan software to analyse the direct comparison results of the literature.  
53  
54 Second, for the indirect comparison results, the author used R and ADDIS software for data  
55  
56 merging, statistical analysis and NMA while drawing a network relationship diagram and  
57  
58 anecdotal sequence diagram of various intervention measures.<sup>21</sup> The R programming language  
59  
60 was used to start the netmeta program and call the Bayesian MCMC (Markov chain-Monte Carlo)

1  
2  
3  
4 algorithm through relevant instructions to realize the network data analysis and mapping of the  
5 random effect model data results. ADDIS statistical software uses relevant instructions to call the  
6 data results of the random effects model based on the Bayesian MCMC algorithm for prior  
7 evaluation and processing.  
8  
9

10  
11  
12  $P < 0.05$  and 95% confidence intervals (95% CI) were used as the standards of significant  
13 difference, and the count data used the OR value as the efficacy analysis statistics; the  
14 measurement data used the weighted mean difference or the standardized mean difference (mean  
15 difference, MD) and indicated that each effect size was expressed with 95% CI.  
16  
17  
18

### 19 20 21 **Assessment of heterogeneity**

22  
23 The heterogeneity was assessed by Cochrane analysis. The  $I^2$  index was used for statistical  
24 heterogeneity assessment, and  $\chi^2$  was used for subgroup analysis based on heterogeneity factors.  
25 The clinical and methodological heterogeneity of the included studies was evaluated, and the  
26 levels of fit of the fixed-effect model and the random-effect model were compared. In the absence  
27 of significant clinical heterogeneity ( $P \geq 0.1$ ,  $I^2 \leq 50\%$ ), a fixed-effects model was used for  
28 meta-analysis. If there was significant clinical heterogeneity between the results of each study  
29 ( $P < 0.1$ ,  $I^2 > 50\%$ ), the source of the heterogeneity was first analysed, the influence of clinical or  
30 methodological heterogeneity was excluded, and the random effects model was used for the  
31 meta-analysis. When the data provided by the clinical trial could not be meta-analysed, they were  
32 subjected to a descriptive analysis.<sup>22</sup>  
33  
34  
35  
36  
37  
38  
39  
40  
41  
42

### 43 44 **Subgroup and sensitivity analyses**

45  
46 If the result of the meta-analysis was positive and more than 3 studies were included, R software  
47 was used to perform a sensitivity analysis of the statistical results. For each excluded study, the  
48 meta-analysis needs was performed again, and the results were compared with the results before  
49 exclusion. If there was no substantial change in the comparative analysis, the result was stable.  
50  
51  
52  
53  
54  
55  
56  
57  
58  
59  
60  
Otherwise, the data results were unstable.

### 56 57 **Assessment of inconsistency**

58  
59  
60  
The Node-Split Model was used for inconsistency testing. If there was no significant difference

1  
2  
3  
4 between the studies within the subgroup ( $P>0.05$ ), the heterogeneity of the included studies was  
5 small, so the consistency model (consistency model) was used for analysis. Otherwise, the  
6 inconsistency model (inconsistency model) was used for analysis. ADDIS software mainly  
7 evaluates the final iterative effect of the interchain and intrachain variances through the  
8 convergence of the model, that is, the subsequent evaluation through the potential scale reduced  
9 factor (PSRF) parameters. The recommended use in this software is to limit the PSRF value,  
10 which is more reasonable to be between 1 and 1.05. If the PSRF is not very close to 1, expansion  
11 of the model can continue. Research through software analysis calculations and data analysis  
12 found that the PSRF was close or equal to 1, indicating that good convergence performance was  
13 achieved, and the results obtained from the consistency model analysis were more reliable.<sup>23</sup>  
14  
15  
16  
17  
18  
19  
20  
21  
22

### 23 **Publication bias**

24 According to the recommendations of the Cochrane Handbook, if more than 10 studies were  
25 included, RevMan software was used to analyse potential publication bias. If the graph showed  
26 inverted funnel-like symmetry, it indicated that the possibility of publication bias was relatively  
27 small. If the funnel chart was asymmetric or incomplete, it indicated that there was a greater  
28 possibility of publication bias.  
29  
30  
31  
32  
33  
34  
35  
36

### 37 **Discussion**

38 Traditional Chinese exercises are aerobic exercises with a strong theoretical basis in Chinese  
39 medicine and a long history. Such exercises are a nondrug therapy guided by the theories of  
40 Chinese medicine.<sup>24</sup> At present, an increasing number of studies have confirmed that long-term  
41 regular and moderate traditional Chinese exercise has obvious effects on controlling diabetes and  
42 lowering blood sugar and can significantly reduce A1C, fasting blood sugar, 2-h postprandial  
43 blood sugar, body mass index, and other disease indicators to improve the quality of life of  
44 patients.  
45  
46  
47  
48  
49  
50  
51  
52

53 In the case of relatively consistent basic treatment methods, the four traditional exercise therapy  
54 adjuvant treatments were clinically comparable. However, at present, traditional Chinese exercise  
55 therapy does not have a unified standard or treatment principle for the treatment of type 2 diabetes.  
56  
57  
58  
59  
60 Most current studies only report the efficacy of a single traditional exercise and the clinical

1  
2  
3  
4 efficacy and safety of four traditional exercises for the treatment of type 2 diabetes, and  
5  
6 comparative studies on NMA are lacking. Therefore, the purpose of this study was to use a  
7  
8 high-quality system to evaluate the four commonly used traditional Chinese exercise therapies, to  
9  
10 use the NMA method to analyse the blood lipids, blood sugar, BMI index and other indicators and  
11  
12 to evaluate the quality of life of the four exercise therapies. To determine the effects of 4  
13  
14 traditional exercise therapies in the treatment of type 2 diabetes, we sorted them according to the  
15  
16 pros and cons of the index effects. Then, we screened out the best evidence of clinical treatment  
17  
18 measures and used the analytic hierarchy process to evaluate the quality of the evidence.

19  
20 **Contributors** YJ and YY contributed to the conception of the study. YJ and YY wrote the draft of  
21  
22 manuscript, and was revised by HH. The search strategy was developed by all of the authors, YJ  
23  
24 and YY will search, extract data, assess the risk of bias, and complete the data synthesis. HH will  
25  
26 arbitrate in case of disagreement and ensure the absence of errors. All authors approved the  
27  
28 publication of the protocol.

29  
30 **Funding** This work was supported by the Preliminary Mechanism and Efficacy Evaluation by  
31  
32 the excellent scientific research and innovation teams at Shandong University of Traditional  
33  
34 Chinese Medicine in the treatment of major diseases (No. 220316).

35  
36  
37 **Disclaimer** The funders had no influence on the study design, data collection and analysis, as well  
38  
39 as the right to publish.

40  
41 **Competing interests** None declared.

## 42 43 44 **References**

45  
46  
47  
48 <sup>1</sup> American Diabetes Association. 2. Classification and Diagnosis of Diabetes: Standards of  
49  
50 Medical Care in Diabetes-2019. *Diabetes Care* 2019;42:S13-S28.doi:10.2337/dc19-S002.

51  
52 <sup>2</sup> Chinese Diabetes Society. Guidelines for the prevention and control of type 2 diabetes in China  
53  
54 (2017 Edition). *Chinese Journal of Practical Internal Medicine* 2018;38:292-344.

55  
56 <sup>3</sup> Xinyue L, Qian L, Guiying S, Yiyang H, Xuepei L, Lin B. Research progress on stem cell therapy  
57  
58 for type 2 diabetes mellitus and associated complications.  
59  
60 *Chinese Journal of Comparative Medicine* 2020;30:96-102.

<sup>4</sup> Qin Z. Nursing common sense to prevent complications of type 2 diabetes. *Special health*

2020;106.

<sup>5</sup> Xingchen Y, Yaling Z, Jingge G, et al. Clinicopathological Characteristics and Prognosis of Minimal Change Nephropathy with Type 2 Diabetes Mellitus. *Chinese General Practice* 2021;24:183-189.

<sup>6</sup> Balducci S, Sacchetti M, Haxhi J, et al. Physical exercise as therapy for type 2 diabetes mellitus. *Diabetes Metab Res Rev* 2014;30 Suppl 1:13-23.doi:10.1002/dmrr.2514.

<sup>7</sup> Guanzhou H, Chenji W, Jiang H. The effect of long-term aerobic exercise on the metabolism of blood glucose and lipids in patients with type 2 diabetes. *Chinese Journal of Physical Medicine and Rehabilitation* 2009;31:555-6.DOI:10.3760/cma.j.issn.0254-1424.2009.08.016.

<sup>8</sup> Jiaqi Z, Yunchuan W. Exercise therapy and type 2 diabete. *World Journal of Integrated Traditional and Western Medicine* 2012;7:455-7.

<sup>9</sup> Yongjia S, Jiyuan Z, Zejia L, et al. Traditional theory of exercise therapy in the modern value of chronic diseases prevention and control. *Clin J Tradit Chin Med* 2015;27:462-4.

<sup>10</sup> Fan W, Enfeng S, Yan B, et al. Tai chi for the treatment of type 2 diabetes. *Clinical Journal of Traditional Chinese Medicine* 2010;205-7.

<sup>11</sup> Xilin L, Yingjie W, Dan R, et al. Analysis of the effect of "5123 Baduanjin" on blood glucose metabolism homeostasis in high-risk populations of type 2 diabetes. *Asia-Pacific Traditional Medicine* 2019;15:124-6.

<sup>12</sup> Xinghai L. Research on Health Qigong·Wuqinxi on Hemorheology of Type 2 Diabetic Patients. *Journal of Liaoning Normal University (Nature Science Edition)* 2007;369-71.

<sup>13</sup> Xuejuan M, Linjun Z, Xuezhen F. Analysis of the clinical effect of traditional fitness exercises·Yijinjing on type 2 diabetes. *Journal of Frontiers of Medicine* 2019;9:65-6.

<sup>14</sup> Chinese Diabetes Society. Guidelines for the prevention and control of type 2 diabetes in China (2010 Edition). *Chinese Journal of Diabetes* 2012;20:81-117.

<sup>15</sup> Chinese Diabetes Society. Guidelines for the prevention and control of type 2 diabetes in China (2013 Edition). *Chinese Journal of Diabetes* 2014;22:2-42.

<sup>16</sup> Zaiying L, Nanshan Z. *Internal Medicine*. Beijing, China: People's Medical Publishing House 2008

<sup>17</sup> Liberati A, Altman DG, Tetzlaff J, et al. The PRISMA statement for reporting systematic reviews and meta-analyses of studies that evaluate health care interventions: explanation and elaboration. *PLoS Med*. 2009;6:e1000100.

<sup>18</sup> Shamseer L, Moher D, Clarke M, et al. Preferred reporting items for systematic review and meta-analysis protocols (PRISMA-P) 2015: elaboration and explanation [published correction appears in *BMJ*. 2016 Jul 21;354:i4086]. *BMJ*. 2015;350:g7647. Published 2015 Jan 2.

<sup>19</sup> Hongqiu G, Yang W, Wei L. Application of Cochrane bias risk assessment tool in meta-analysis of randomized controlled study. *Chinese Circulation Journal* 2014;29:147-8.

---

1  
2  
3  
4  
5  
6  
7  
8  
9  
10  
11  
12  
13  
14  
15  
16  
17  
18  
19  
20  
21  
22  
23  
24  
25  
26  
27  
28  
29  
30  
31  
32  
33  
34  
35  
36  
37  
38  
39  
40  
41  
42  
43  
44  
45  
46  
47  
48  
49  
50  
51  
52  
53  
54  
55  
56  
57  
58  
59  
60

<sup>20</sup> Jie M, Ying L, Laiping Z, et al. Application and comparison of Jadad scale and Cochrane bias risk assessment tool in quality evaluation of randomized controlled trials. *China Journal of Oral and Maxillofacial Surgery* 2012;10:417–22.

<sup>21</sup> Chao Z, Feng S, Xiantao Z. R software calls JAGS software to realize network meta-analysis. *Chinese Journal of Evidence-Based Medicine* 2014;14:241–8.

<sup>22</sup> Dan W, Junxia ZH, Zhenyun M, et al. Heterogeneity and its treatment in meta analysis. *Chinese Journal of Evidence-Based Medicine* 2009;9:1115–8.

<sup>23</sup> Gert van Valkenhoef, Tommi Tervonen, Tijs Zwinkels, et al. ADDIS: A decision support system for evidence-based medicine. 2013, 55(2):459-75.

<sup>24</sup> Dongmei Y, Xiangdi L, Zhihong L, et al. Research progress of traditional Chinese medicine exercise therapy on diabetes mellitus. *Clinical Journal of Chinese Medicine* 2017;9:59-61.



1  
2  
3  
4  
5  
6  
7  
8  
9  
10  
11  
12  
13  
14  
15  
16  
17  
18  
19  
20  
21  
22  
23  
24  
25  
26  
27  
28  
29  
30  
31  
32  
33  
34  
35  
36  
37  
38  
39  
40  
41  
42  
43  
44  
45  
46  
47  
48  
49  
50  
51  
52  
53  
54  
55  
56  
57  
58  
59  
60

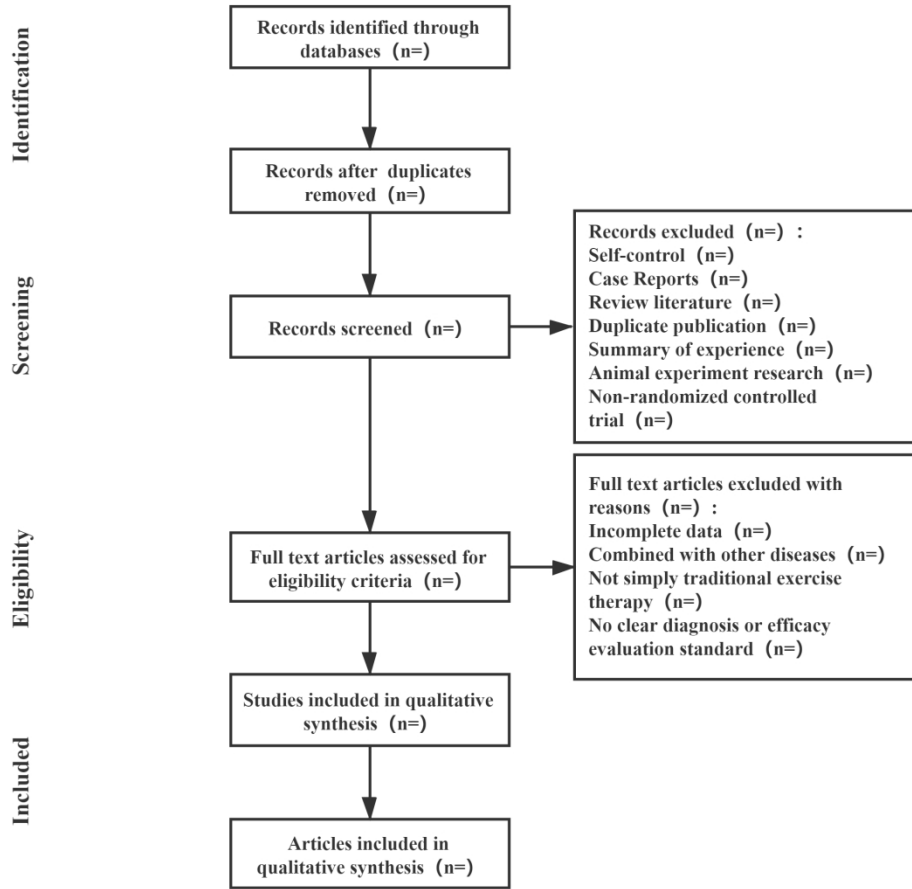

Flow diagram of study

764x746mm (72 x 72 DPI)

# BMJ Open

## Network meta-analysis of four kinds of traditional Chinese exercise therapy in the treatment of type 2 diabetes: protocol for a systematic review

|                                 |                                                                                                                                                                                                                                                |
|---------------------------------|------------------------------------------------------------------------------------------------------------------------------------------------------------------------------------------------------------------------------------------------|
| Journal:                        | <i>BMJ Open</i>                                                                                                                                                                                                                                |
| Manuscript ID                   | bmjopen-2020-048259.R1                                                                                                                                                                                                                         |
| Article Type:                   | Protocol                                                                                                                                                                                                                                       |
| Date Submitted by the Author:   | 21-Jun-2021                                                                                                                                                                                                                                    |
| Complete List of Authors:       | jia, yuqi; Shandong University of Traditional Chinese Medicine, yu, ying; Shandong University of Traditional Chinese Medicine, College of Traditional Chinese Medicine<br>Huang, Hailiang; Shandong University of Traditional Chinese Medicine |
| <b>Primary Subject Heading</b>: | Diabetes and endocrinology                                                                                                                                                                                                                     |
| Secondary Subject Heading:      | Sports and exercise medicine                                                                                                                                                                                                                   |
| Keywords:                       | General diabetes < DIABETES & ENDOCRINOLOGY, Protocols & guidelines < HEALTH SERVICES ADMINISTRATION & MANAGEMENT, SPORTS MEDICINE, REHABILITATION MEDICINE                                                                                    |
|                                 |                                                                                                                                                                                                                                                |

SCHOLARONE™  
Manuscripts



I, the Submitting Author has the right to grant and does grant on behalf of all authors of the Work (as defined in the below author licence), an exclusive licence and/or a non-exclusive licence for contributions from authors who are: i) UK Crown employees; ii) where BMJ has agreed a CC-BY licence shall apply, and/or iii) in accordance with the terms applicable for US Federal Government officers or employees acting as part of their official duties; on a worldwide, perpetual, irrevocable, royalty-free basis to BMJ Publishing Group Ltd ("BMJ") its licensees and where the relevant Journal is co-owned by BMJ to the co-owners of the Journal, to publish the Work in this journal and any other BMJ products and to exploit all rights, as set out in our [licence](#).

The Submitting Author accepts and understands that any supply made under these terms is made by BMJ to the Submitting Author unless you are acting as an employee on behalf of your employer or a postgraduate student of an affiliated institution which is paying any applicable article publishing charge ("APC") for Open Access articles. Where the Submitting Author wishes to make the Work available on an Open Access basis (and intends to pay the relevant APC), the terms of reuse of such Open Access shall be governed by a Creative Commons licence – details of these licences and which [Creative Commons](#) licence will apply to this Work are set out in our licence referred to above.

Other than as permitted in any relevant BMJ Author's Self Archiving Policies, I confirm this Work has not been accepted for publication elsewhere, is not being considered for publication elsewhere and does not duplicate material already published. I confirm all authors consent to publication of this Work and authorise the granting of this licence.

# Network meta-analysis of four kinds of traditional Chinese exercise therapy in the treatment of type 2 diabetes: protocol for a systematic review

Yuqi Jia,<sup>1</sup> Ying Yu,<sup>1</sup> Hailiang Huang,<sup>1</sup>

<sup>1</sup> Shandong University of Traditional Chinese Medicine, Jinan, China

Correspondence to: Professor Hailiang Huang; huanghailiang@sducm.edu.cn

## ABSTRACT

**Introduction:** Traditional Chinese exercise therapy, as one of the commonly used exercise interventions for the treatment of type 2 diabetes patients in China, has been proven effective by many clinical practices, but there is still a lack of evidence-based research. This study aims to integrate clinical randomized controlled correlations via network meta-analysis evidence.

**Methods and analysis:** The comprehensive search included Chinese and other language databases such as the MEDLINE (PubMed), Web of Science, Excerpt Medica Database (EMBASE), The Cochrane Library, China National Knowledge Infrastructure (CNKI), Wanfang Data Knowledge Service Platform, China Scientific Journal Database (VIP), China Biomedical Literature Database (CBM). Clinical randomized controlled trials of four traditional Chinese exercise therapies in the treatment of type 2 diabetes, including Tai Chi, Ba Duan Jin, Yi Jin Jing, and Wu Qin Xi were retrieved. The search time was conducted from the establishment of the database to October 30, 2020. Two researchers screened the documents that met the inclusion criteria, extracted data according to the pre-set table, and evaluated the methodological quality of the included studies according to the quality evaluation tools recommended by the Cochrane System Reviewer Manual Version 5.1. The R language and ADDIS statistical software were used to conduct statistics and analysis of intervention measures.

**Trial registration number:** PROSPERO CRD42020214786

### Strengths and limitations of this study

- This study may provide the best possible exercise therapy options and reliable evidence-based medicine for the clinical treatment of type 2 diabetes.
- To a certain extent, may provide some new insights for the auxiliary treatment of type 2 diabetes by exercise therapy.
- This study also has some limitations, including publication bias, clinical heterogeneity and selection bias.

## INTRODUCTION

Type 2 diabetes (type 2 diabetes mellitus, T2DM), also known as non-insulin-dependent diabetes, is the most common form of clinical diabetes and mainly manifests as persistent hyperglycaemia. Its aetiology and pathogenesis are not yet clear, but the disease is mainly related to insulin secretion defects related to inflammation and metabolic stress, including the involvement of genetic factors.<sup>1</sup> The significant pathophysiological feature of type 2 diabetes is the decrease in insulin's ability to regulate glucose metabolism (insulin resistance) and the decrease (or relative decrease) in insulin secretion caused by defects in pancreatic islet B cell function.<sup>2</sup> As the natural course of the disease develops, the dependence on exogenous blood sugar control increases, which can affect multiple tissues and organs and can cause a variety of secondary complications.<sup>3</sup> The disease can affect the large blood vessels (cerebrovascular disease, cardiovascular disease), microvasculature (podiatry, eye disease, kidney disease) and nerves (nephropathy, eye disease),<sup>4</sup> reducing the quality of life of patients and endangering patients' lives.

With the improvement of living standards and changes in the human living environment, the incidence of T2DM is increasing.<sup>5</sup> At present, the main methods of blood sugar control in T2DM patients involve oral hypoglycaemic drugs and exogenous insulin supplements. Traditional treatment is highly dependent on drugs, and oral drugs and exogenous insulin can only temporarily maintain blood sugar or temporarily improve insulin sensitivity and are not curative.<sup>3</sup>

According to the latest version of the domestic guidelines for the prevention and treatment of type 2 diabetes (2017 edition), lifestyle intervention is the basic treatment measure for T2DM and is required for the treatment of diabetes; exercise plays an important role in the comprehensive management of T2DM patients.<sup>2</sup> According to the guidelines of the American College of Sports

1  
2  
3  
4 Medicine and the American Diabetes Association, it is recommended that diabetic patients  
5 perform aerobic exercise. Patients with type 2 diabetes should perform at least 150 minutes of  
6 moderate- or higher-intensity exercise a week, and they should perform it at least 3 days a week.<sup>6</sup>  
7  
8 Long-term regular aerobic exercise can improve the body weight and blood sugar and blood lipid  
9 levels of type 2 diabetes patients and has an important role in the rehabilitation of type 2 diabetes  
10 and the prevention of complications.<sup>7</sup>  
11  
12

13  
14  
15  
16 Traditional Chinese exercise therapy conforms to the characteristics of low-intensity and  
17 long-term aerobic exercise proposed by modern research. It is guided by the holistic concept of  
18 Chinese medicine as the main theoretical guide. By mobilizing the human body's own potential, it  
19 can achieve the purpose of healing and strengthening the body, preventing and curing diseases,  
20 and it is a nondrug therapy for T2DM.<sup>8-9</sup> In recent years, a number of randomized controlled  
21 studies have shown that four traditional exercise therapies play an irreplaceable role in the  
22 prevention of T2DM at all levels. Studies have found that Tai Chi can reduce damage to  
23 pancreatic islet cells by downregulating the expression of inflammatory cytokines, improving the  
24 body's sensitivity to insulin, improving insulin resistance, delaying the occurrence of diabetes  
25 complications, and improving the quality of life of patients with T2DM.<sup>10</sup> The application of  
26 Baduanjin in high-risk populations for diabetes can delay the time of glucose metabolism  
27 disorders, exert good stabilizing effects on blood sugar and glycosylated haemoglobin, and reduce  
28 regulatory fluctuations.<sup>11</sup> Wuqinxi exercise can significantly improve the blood rheology of  
29 patients with T2DM and improve blood circulation function.<sup>12</sup> Yijinjing can effectively regulate  
30 liver and spleen function in patients with T2DM and can help improve blood sugar levels.<sup>13</sup>  
31  
32  
33  
34  
35  
36  
37  
38  
39  
40  
41  
42  
43  
44  
45

46 At present, studies in this area mostly use randomized controlled trials to verify the clinical  
47 efficacy of a single traditional exercise therapy on T2DM, and there is no evidence-based  
48 evaluation that compares the clinical efficacy of four traditional exercise therapies for T2DM at  
49 the same time. Therefore, this study selected four traditional exercise therapies commonly used in  
50 clinical practice as the research objects and used the method of network meta-analysis to integrate  
51 relevant clinical evidence. After summarizing different interventions in the same body of evidence,  
52 a quantitative comprehensive statistical analysis was performed to compare the clinical efficacy of  
53 four different traditional Chinese exercise therapies in the treatment of T2DM. Our purpose is to  
54  
55  
56  
57  
58  
59  
60

1  
2  
3  
4 provide a reference for clinical treatment of T2DM to choose more effective exercise intervention  
5  
6 therapies.

## 8 **METHODS AND ANALYSIS**

### 10 **Patient and public involvement**

11  
12  
13 No patients involved.

### 15 **Eligibility criteria**

16  
17  
18 The design of the inclusion and exclusion criteria of this study was based on the five main  
19  
20 principles of the Participant-Intervention-Comparator-Outcomes-Study (PICOS) design search  
21  
22 principle.

### 23 **Inclusion criteria**

#### 24 **Types of studies**

25  
26  
27 The included literature type was randomized controlled trials (RCT), and there were no  
28  
29 restrictions regarding the type of language, whether blinding was used, or the requirements for  
30  
31 allocation concealment. Most of the clinical trial reports in this study were from mainland China.  
32  
33 As long as the included studies were approved by the local institution, we included the study in the  
34  
35 scope of the study and registered it in the international database.  
36  
37  
38

#### 39 **Type of participants**

40  
41  
42 The patients all had type 2 diabetes, regardless of age, sex, and race. The diagnostic criteria used  
43  
44 for diabetes should comply with the "China Type 2 Diabetes Guidelines (2010 Edition)",<sup>14</sup> "China  
45  
46 Type 2 Diabetes Prevention Guidelines (2013 Edition)",<sup>15</sup> "China Type 2 Diabetes Prevention  
47  
48 Guidelines (2017 Edition)",<sup>2</sup> "Diagnostic Guidelines for Diabetes Diagnosis and Classification  
49  
50 Standards Revised by WHO in 1997"<sup>16</sup> and "Diagnostic Standards for Diabetes Made by WHO in  
51  
52 1999".  
53

#### 54 **Types of interventions and comparators**

55  
56  
57 The control group received conventional basic treatment (e.g., hyperglycaemic treatment, health  
58  
59 education, voluntary exercise) without exercise intervention. The treatment group was treated with  
60

1  
2  
3  
4 one of the four traditional exercise therapies when the diagnostic criteria, curative effect  
5 evaluation criteria, and basic treatment were the same.  
6  
7

### 8 **Types of outcomes**

9  
10 The predetermined main outcomes indicators were as follows: (a) blood glucose, including fasting  
11 blood glucose (FBG, FPG), 2-h postprandial blood glucose (2hPG, PPG), and glycosylated  
12 haemoglobin (GHb, HbA1c); (b) blood lipids, including total cholesterol (TC) and triglycerides  
13 (TG), high-density lipoprotein (HDL-C), and low-density lipoprotein (LDL-C).  
14  
15  
16  
17

18  
19 Secondary outcomes indicators included: (a) body mass index BMI; (b) hemorheology indicators  
20 (whole blood low shear viscosity, whole blood high shear viscosity, plasma viscosity, haematocrit,  
21 erythrocyte sedimentation rate, red blood cell aggregation index, Fib, sICAM, and Ps); (c) quality  
22 of life evaluations, including the quality of life specific scale (DSQL) or SF-36 scale evaluations.  
23  
24  
25  
26  
27

### 28 **Exclusion criteria**

29  
30 Self-control studies, case reports, review literature, duplicate publication, summary of experiences,  
31 animal experiment reasearch, studies with incomplete data, studies with patients that have other  
32 diseases, studies with no clear diagnosis or efficacy evaluation standard, studies combined with  
33 other therapy that are different from the control group.  
34  
35  
36  
37  
38

### 39 **Search methods for identification of studies**

#### 40 **Information sources**

41  
42 A computer was used to conduct a comprehensive search for 4 traditional randomized controlled  
43 trials (RCTs) for the treatment of type 2 diabetes. The search time was from the establishment of  
44 the database to October 30, 2020. Computer databases searched included PubMed, Web of  
45 Science, EMBASE, The Cochrane Library, China Knowledge Network (CNKI), Wanfang Data  
46 Knowledge Service Platform, VIP.com (VIP), and China Biomedical Literature Database (CBM).  
47  
48 Chinese search terms included Tai Chi, Ba Duan Jin, Yi Jin Jing, Wu Qin Xi, traditional exercises,  
49 Health Qigong, type 2 diabetes, and random, etc. English search terms included Tai Chi, Ba Duan  
50 Jin, Yi Jin Jing, Wu Qin Xi, Traditional Exercises, Health Qigong, Type 2 Diabetes, and Random,  
51 etc.  
52  
53  
54  
55  
56  
57  
58  
59  
60





## Study selection and data extraction

According to the abovementioned electronic database search strategy, two researchers searched Chinese and English electronic databases, used Endnote X7 software to search for repeated studies, integrated the literature search results of different databases, established an information database, and downloaded the full texts. Then, two researchers conducted preliminary screening independently, extracted data according to a predetermined table, conducted cross-checking and review, recorded the reasons for each excluded study, and invited third-party experts to discuss and research different opinions to make the final decision. The PRISMA flowchart selected for this process is shown in Figure 1.<sup>17-18</sup>

The data extraction content included the basic information of the included literature (including the first author, published journal and year, research topic); the relevant information of the experimental group and the control group in the literature (including the number of cases, disease course, age, intervention measures, treatment course, and outcome indicators); the design type and the quality evaluation information of the included literature (e.g., random method, blind method, allocation concealment, completeness of outcome data, selective reporting results, other sources of bias).

## Study quality evaluation

According to the quality evaluation standards of the Cochrane System Review Manual, RevMan quality evaluation tools were used to evaluate the methodological quality of the included studies, including random methods, allocation concealment, blinding, completeness of outcome data, selective reporting results, and other sources of bias. Each project was divided into three types of results: high risk, low risk and uncertainty risk. Based on the above descriptions, the two researchers conducted individual induction studies and completed the quality evaluation results of the included literature. If the results were different, third-party experts were invited to help discuss and explain the quality evaluation. Cochrane's standard manual was used for literature quality evaluation and bias risk assessment.<sup>19-20</sup>

## Data synthesis and statistical methods

## Pairwise and network meta-analysis

First, the author used RevMan software to analyse the direct comparison results of the literature. Second, for the indirect comparison results, the author used R and ADDIS software for data merging, statistical analysis and NMA while drawing a network relationship diagram and anecdotal sequence diagram of various intervention measures.<sup>21</sup> The R programming language was used to start the netmeta program and call the Bayesian MCMC (Markov chain-Monte Carlo) algorithm through relevant instructions to realize the network data analysis and mapping of the random effect model data results. ADDIS statistical software uses relevant instructions to call the data results of the random effects model based on the Bayesian MCMC algorithm for prior evaluation and processing.

$P < 0.05$  and 95% confidence intervals (95% CI) were used as the standards of significant difference, and the count data used the OR value as the efficacy analysis statistics; the measurement data used the weighted mean difference or the standardized mean difference (mean difference, MD) and indicated that each effect size was expressed with 95% CI.

## Assessment of heterogeneity

The heterogeneity was assessed by Cochrane analysis. The  $I^2$  index was used for statistical heterogeneity assessment, and  $\chi^2$  was used for subgroup analysis based on heterogeneity factors. The clinical and methodological heterogeneity of the included studies was evaluated, and the levels of fit of the fixed-effect model and the random-effect model were compared. In the absence of significant clinical heterogeneity ( $P \geq 0.1$ ,  $I^2 \leq 50\%$ ), a fixed-effects model was used for meta-analysis. If there was significant clinical heterogeneity between the results of each study ( $P < 0.1$ ,  $I^2 > 50\%$ ), the source of the heterogeneity was first analysed, the influence of clinical or methodological heterogeneity was excluded, and the random effects model was used for the meta-analysis. When the data provided by the clinical trial could not be meta-analysed, they were subjected to a descriptive analysis.<sup>22</sup>

## Subgroup and sensitivity analyses

If there is heterogeneity and the data is sufficient, we will try to use subgroup analysis to find out the reasons for the heterogeneity and compare the effects of each group. Data may be compared

1  
2  
3  
4 between patients of different gender, age, course of disease, and treatment time. If the result of the  
5 meta-analysis was positive and more than 3 studies were included, R software was used to  
6 perform a sensitivity analysis of the statistical results. For each excluded study, the meta-analysis  
7 needs was performed again, and the results were compared with the results before exclusion. If  
8 there was no substantial change in the comparative analysis, the result was stable. Otherwise, the  
9 data results were unstable.

### 16 **Assessment of inconsistency**

17  
18 The Node-Split Model was used for inconsistency testing. If there was no significant difference  
19 between the studies within the subgroup ( $P > 0.05$ ), the heterogeneity of the included studies was  
20 small, so the consistency model (consistency model) was used for analysis. Otherwise, the  
21 inconsistency model (inconsistency model) was used for analysis. ADDIS software mainly  
22 evaluates the final iterative effect of the interchain and intrachain variances through the  
23 convergence of the model, that is, the subsequent evaluation through the potential scale reduced  
24 factor (PSRF) parameters. The recommended use in this software is to limit the PSRF value,  
25 which is more reasonable to be between 1 and 1.05. If the PSRF is not very close to 1, expansion  
26 of the model can continue. Research through software analysis calculations and data analysis  
27 found that the PSRF was close or equal to 1, indicating that good convergence performance was  
28 achieved, and the results obtained from the consistency model analysis were more reliable.<sup>23</sup>

### 40 **Publication bias**

41  
42 According to the recommendations of the Cochrane Handbook, if more than 10 studies were  
43 included, RevMan software was used to analyse potential publication bias. If the graph showed  
44 inverted funnel-like symmetry, it indicated that the possibility of publication bias was relatively  
45 small. If the funnel chart was asymmetric or incomplete, it indicated that there was a greater  
46 possibility of publication bias.

### 53 **Discussion**

54  
55 Traditional Chinese exercises are aerobic exercises with a strong theoretical basis in Chinese  
56 medicine and a long history. Such exercises are a nondrug therapy guided by the theories of  
57 Chinese medicine.<sup>24</sup> At present, an increasing number of studies have confirmed that long-term  
58  
59  
60

1  
2  
3  
4 regular and moderate traditional Chinese exercise has obvious effects on controlling diabetes and  
5  
6 lowering blood sugar and can significantly reduce A1C, fasting blood sugar, 2-h postprandial  
7  
8 blood sugar, body mass index, and other disease indicators to improve the quality of life of  
9  
10 patients.

11  
12 In the case of relatively consistent basic treatment methods, the four traditional exercise therapy  
13  
14 adjuvant treatments were clinically comparable. However, at present, traditional Chinese exercise  
15  
16 therapy does not have a unified standard or treatment principle for the treatment of type 2 diabetes.  
17  
18 Most current studies only report the efficacy of a single traditional exercise and the clinical  
19  
20 efficacy and safety of four traditional exercises for the treatment of type 2 diabetes, and  
21  
22 comparative studies on NMA are lacking. Therefore, the purpose of this study was to use a  
23  
24 high-quality system to evaluate the four commonly used traditional Chinese exercise therapies, to  
25  
26 use the NMA method to analyse the blood lipids, blood sugar, BMI index and other indicators and  
27  
28 to evaluate the quality of life of the four exercise therapies. To determine the effects of 4  
29  
30 traditional exercise therapies in the treatment of type 2 diabetes, we will sort them according to the  
31  
32 pros and cons of the index effects. Then, we will screen out the best evidence of clinical treatment  
33  
34 measures and used the analytic hierarchy process to evaluate the quality of the evidence. Our  
35  
36 review may provide the best possible exercise therapy options and reliable evidence-based  
37  
38 medicine for the clinical treatment of type 2 diabetes, and to a certain extent, can provide some  
39  
40 new insights for the auxiliary treatment of type 2 diabetes by exercise therapy.

41  
42 **Contributors** YJ and YY contributed to the conception of the study. YJ and YY wrote the draft of  
43  
44 manuscript, and was revised by HH. The search strategy was developed by all of the authors, YJ  
45  
46 and YY will search, extract data, assess the risk of bias, and complete the data synthesis. HH will  
47  
48 arbitrate in case of disagreement and ensure the absence of errors. All authors approved the  
49  
50 publication of the protocol.

51  
52 **Funding** This work was supported by the Preliminary Mechanism and Efficacy Evaluation by  
53  
54 the excellent scientific research and innovation teams at Shandong University of Traditional  
55  
56 Chinese Medicine in the treatment of major diseases (No. 220316).(Corresponding author Huang  
57  
58 Hailiang is the project leader)

**Disclaimer** The funders had no influence on the study design, data collection and analysis, as well as the right to publish.

**Competing interests** None declared.

**Ethics and dissemination:** Since the NMA protocol has been approved by the local institutional review board and ethics committee, it does not involve private information, nor does it require further ethical approval or informed consent. We will complete this study according to the "Cochrane Intervention System Evaluation Manual" and the "System Evaluation and Network Meta-Analysis Program" (PRISMAP). According to the guidelines of the PRISMA NMA extended statement, a report on the further results of this research will be submitted.

## References

- <sup>1</sup> American Diabetes Association. 2. Classification and Diagnosis of Diabetes: Standards of Medical Care in Diabetes-2019. *Diabetes Care* 2019;42:S13-S28.doi:10.2337/dc19-S002.
- <sup>2</sup> Chinese Diabetes Society. Guidelines for the prevention and control of type 2 diabetes in China (2017 Edition). *Chinese Journal of Practical Internal Medicine* 2018;38:292-344.
- <sup>3</sup> Xinyue L, Qian L, Guiying S, Yiying H, Xuepei L, Lin B. Research progress on stem cell therapy for type 2 diabetes mellitus and associated complications. *Chinese Journal of Comparative Medicine* 2020;30:96-102.
- <sup>4</sup> Qin Z. Nursing common sense to prevent complications of type 2 diabetes. *Special health* 2020;106.
- <sup>5</sup> Xingchen Y, Yaling Z, Jingge G, et al. Clinicopathological Characteristics and Prognosis of Minimal Change Nephropathy with Type 2 Diabetes Mellitus. *Chinese General Practice* 2021;24:183-189.
- <sup>6</sup> Balducci S, Sacchetti M, Haxhi J, et al. Physical exercise as therapy for type 2 diabetes mellitus. *Diabetes Metab Res Rev* 2014;30 Suppl 1:13-23.doi:10.1002/dmrr.2514.
- <sup>7</sup> Guanzhou H, Chenji W, Jiang H. The effect of long-term aerobic exercise on the metabolism of blood glucose and lipids in patients with type 2 diabete. *Chinese Journal of Physical Medicine and Rehabilitation* 2009;31:555-6.DOI:10.3760/cma.j.issn.0254-1424.2009.08.016.
- <sup>8</sup> Jiaqi Z, Yunchuan W. Exercise therapy and type 2 diabete. *World Journal of Integrated Traditional and Western Medicine* 2012;7:455-7.
- <sup>9</sup> Yongjia S, Jiyuan Z, Zejia L, et al. Traditional theory of exercise therapy in the modern value of chronic diseases prevention and control. *Clin J Tradit Chin Med* 2015;27:462-4.
- <sup>10</sup> Fan W, Enfeng S, Yan B, et al. Tai chi for the treatment of type 2 diabetes. *Clinical Journal of*

1  
2  
3  
4  
5  
6  
7  
8  
9  
10  
11  
12  
13  
14  
15  
16  
17  
18  
19  
20  
21  
22  
23  
24  
25  
26  
27  
28  
29  
30  
31  
32  
33  
34  
35  
36  
37  
38  
39  
40  
41  
42  
43  
44  
45  
46  
47  
48  
49  
50  
51  
52  
53  
54  
55  
56  
57  
58  
59  
60

*Traditional Chinese Medicine* 2010;205-7.

<sup>11</sup> Xilin L, Yingjie W, Dan R, et al. Analysis of the effect of "5123 Baduanjin" on blood glucose metabolism homeostasis in high-risk populations of type 2 diabetes. *Asia-Pacific Traditional Medicine* 2019;15:124-6.

<sup>12</sup> Xinghai L. Research on Health Qigong·Wuqinxi on Hemorheology of Type 2 Diabetic Patients. *Journal of Liaoning Normal University (Nature Science Edition)* 2007;369-71.

<sup>13</sup> Xuejuan M, Linjun Z, Xuezhen F. Analysis of the clinical effect of traditional fitness exercises·Yijinjing on type 2 diabetes. *Journal of Frontiers of Medicine* 2019;9:65-6.

<sup>14</sup> Chinese Diabetes Society. Guidelines for the prevention and control of type 2 diabetes in China (2010 Edition). *Chinese Journal of Diabetes* 2012;20:81-117.

<sup>15</sup> Chinese Diabetes Society. Guidelines for the prevention and control of type 2 diabetes in China (2013 Edition). *Chinese Journal of Diabetes* 2014;22:2-42.

<sup>16</sup> Zaiying L, Nanshan Z. *Internal Medicine*. Beijing, China: People's Medical Publishing House 2008

<sup>17</sup> Liberati A, Altman DG, Tetzlaff J, et al. The PRISMA statement for reporting systematic reviews and meta-analyses of studies that evaluate health care interventions: explanation and elaboration. *PLoS Med.* 2009;6:e1000100.

<sup>18</sup> Shamseer L, Moher D, Clarke M, et al. Preferred reporting items for systematic review and meta-analysis protocols (PRISMA-P) 2015: elaboration and explanation [published correction appears in *BMJ*. 2016 Jul 21;354:i4086]. *BMJ*. 2015;350:g7647. Published 2015 Jan 2.

<sup>19</sup> Hongqiu G, Yang W, Wei L. Application of Cochrane bias risk assessment tool in meta-analysis of randomized controlled study. *Chinese Circulation Journal* 2014;29:147-8.

<sup>20</sup> Jie M, Ying L, Laiping Z, et al. Application and comparison of Jadad scale and Cochrane bias risk assessment tool in quality evaluation of randomized controlled trials. *China Journal of Oral and Maxillofacial Surgery* 2012;10:417-22.

<sup>21</sup> Chao Z, Feng S, Xiantao Z. R software calls JAGS software to realize network meta-analysis. *Chinese Journal of Evidence-Based Medicine* 2014;14:241-8.

<sup>22</sup> Dan W, Junxia ZH, Zhenyun M, et al. Heterogeneity and its treatment in meta analysis. *Chinese Journal of Evidence-Based Medicine* 2009;9:1115-8.

<sup>23</sup> Gert van Valkenhoef, Tommi Tervonen, Tijs Zwinkels, et al. ADDIS: A decision support system for evidence-based medicine. 2013, 55(2):459-75.

<sup>24</sup> Dongmei Y, Xiangdi L, Zhihong L, et al. Research progress of traditional Chinese medicine exercise therapy on diabetes mellitus. *Clinical Journal of Chinese Medicine* 2017;9:59-61.

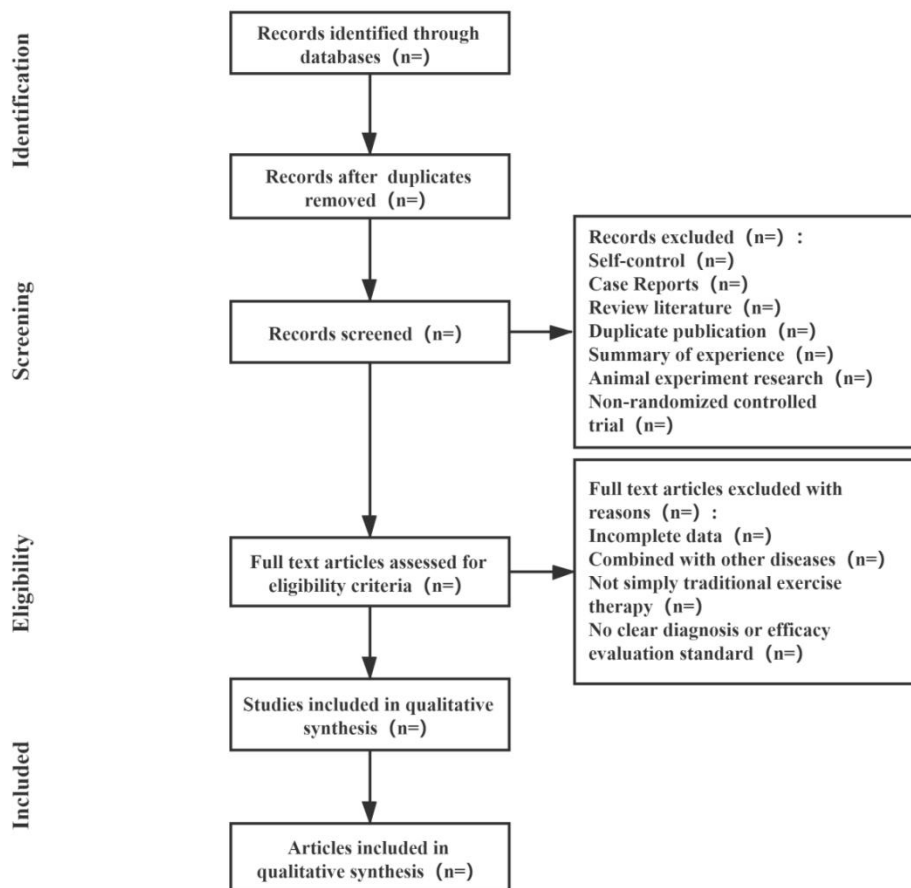

Figure 1

132x129mm (220 x 220 DPI)



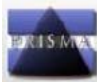

# PRISMA 2009 Checklist

1  
2  
3  
4  
5  
6  
7  
8  
9  
10  
11  
12  
13  
14  
15  
16  
17  
18  
19  
20  
21  
22  
23  
24  
25  
26  
27  
28  
29  
30  
31  
32  
33  
34  
35  
36  
37  
38  
39  
40  
41  
42  
43  
44  
45  
46  
47

| Section/topic       | # | Checklist item                                                                                                                                                                                                                                                                                                                                                                                                                                                                                                                                                                                                                                                                                                                                                                                                                                                                                                                                                                                                                                                                                                                                                                                                                                                                                                                                                                                                                                                                                                                                                                         | Reported on page # |
|---------------------|---|----------------------------------------------------------------------------------------------------------------------------------------------------------------------------------------------------------------------------------------------------------------------------------------------------------------------------------------------------------------------------------------------------------------------------------------------------------------------------------------------------------------------------------------------------------------------------------------------------------------------------------------------------------------------------------------------------------------------------------------------------------------------------------------------------------------------------------------------------------------------------------------------------------------------------------------------------------------------------------------------------------------------------------------------------------------------------------------------------------------------------------------------------------------------------------------------------------------------------------------------------------------------------------------------------------------------------------------------------------------------------------------------------------------------------------------------------------------------------------------------------------------------------------------------------------------------------------------|--------------------|
| <b>TITLE</b>        |   |                                                                                                                                                                                                                                                                                                                                                                                                                                                                                                                                                                                                                                                                                                                                                                                                                                                                                                                                                                                                                                                                                                                                                                                                                                                                                                                                                                                                                                                                                                                                                                                        |                    |
| Title               | 1 | Network meta-analysis of four kinds of traditional Chinese exercise therapy in the treatment of type 2 diabetes: protocol for a systematic review                                                                                                                                                                                                                                                                                                                                                                                                                                                                                                                                                                                                                                                                                                                                                                                                                                                                                                                                                                                                                                                                                                                                                                                                                                                                                                                                                                                                                                      | 1                  |
| <b>ABSTRACT</b>     |   |                                                                                                                                                                                                                                                                                                                                                                                                                                                                                                                                                                                                                                                                                                                                                                                                                                                                                                                                                                                                                                                                                                                                                                                                                                                                                                                                                                                                                                                                                                                                                                                        |                    |
| Structured summary  | 2 | <p><b>ABSTRACT</b></p> <p>Introduction: Traditional Chinese exercise therapy, as one of the commonly used exercise interventions for the treatment of type 2 diabetes patients in China, has been proven effective by many clinical practices, but there is still a lack of evidence-based research. This study aims to integrate clinical randomized controlled correlations via network meta-analysis evidence. Methods and analysis: The comprehensive search included Chinese and other language databases such as the MEDLINE (PubMed), Web of Science, Excerpt Medica Database (EMBASE), The Cochrane Library, China National Knowledge Infrastructure (CNKI), Wanfang Data Knowledge Service Platform, China Scientific Journal Database (VIP), China Biomedical Literature Database (CBM). Clinical randomized controlled trials of four traditional Chinese exercise therapies in the treatment of type 2 diabetes, including Tai Chi, Ba Duan Jin, Yi Jin Jing, and Wu Qin Xi were retrieved. The search time was conducted from the establishment of the database to October 30, 2020. Two researchers screened the documents that met the inclusion criteria, extracted data according to the pre-set table, and evaluated the methodological quality of the included studies according to the quality evaluation tools recommended by the Cochrane System Reviewer Manual Version 5.1. The R language and ADDIS statistical software were used to conduct statistics and analysis of intervention measures.</p> <p>Trial registration number: PROSPERO CRD42020214786</p> | 1                  |
| <b>INTRODUCTION</b> |   |                                                                                                                                                                                                                                                                                                                                                                                                                                                                                                                                                                                                                                                                                                                                                                                                                                                                                                                                                                                                                                                                                                                                                                                                                                                                                                                                                                                                                                                                                                                                                                                        |                    |
| Rationale           | 3 | Type 2 diabetes (type 2 diabetes mellitus, T2DM), also known as non-insulin-dependent diabetes, is the most common form of clinical diabetes and mainly manifests as persistent hyperglycaemia. Its aetiology and pathogenesis are not yet clear, but the disease is mainly related to insulin secretion defects related to inflammation and metabolic stress, including the involvement of genetic factors. The significant pathophysiological feature of type 2 diabetes is the decrease in insulin's ability to regulate glucose metabolism (insulin resistance) and the decrease (or relative decrease) in insulin secretion caused by defects in pancreatic islet B cell function. As the natural course of the disease develops, the dependence on exogenous blood sugar control increases, which can affect multiple tissues                                                                                                                                                                                                                                                                                                                                                                                                                                                                                                                                                                                                                                                                                                                                                    | 2,3                |

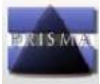

# PRISMA 2009 Checklist

and organs and can cause a variety of secondary complications. The disease can affect the large blood vessels (cerebrovascular disease, cardiovascular disease), microvasculature (podiatry, eye disease, kidney disease) and nerves (nephropathy, eye disease), reducing the quality of life of patients and endangering patients' lives. With the improvement of living standards and changes in the human living environment, the incidence of T2DM is increasing. At present, the main methods of blood sugar control in T2DM patients involve oral hypoglycaemic drugs and exogenous insulin supplements. Traditional treatment is highly dependent on drugs, and oral drugs and exogenous insulin can only temporarily maintain blood sugar or temporarily improve insulin sensitivity and are not curative.

According to the latest version of the domestic guidelines for the prevention and treatment of type 2 diabetes (2017 edition), lifestyle intervention is the basic treatment measure for T2DM and is required for the treatment of diabetes; exercise plays an important role in the comprehensive management of T2DM patients. **Error! Bookmark not defined.** According to the guidelines of the American College of Sports Medicine and the American Diabetes Association, it is recommended that diabetic patients perform aerobic exercise. Patients with type 2 diabetes should perform at least 150 minutes of moderate- or higher-intensity exercise a week, and they should perform it at least 3 days a week. Long-term regular aerobic exercise can improve the body weight and blood sugar and blood lipid levels of type 2 diabetes patients and has an important role in the rehabilitation of type 2 diabetes and the prevention of complications.

Traditional Chinese exercise therapy conforms to the characteristics of low-intensity and long-term aerobic exercise proposed by modern research. It is guided by the holistic concept of Chinese medicine as the main theoretical guide. By mobilizing the human body's own potential, it can achieve the purpose of healing and strengthening the body, preventing and curing diseases, and it is a nondrug therapy for T2DM. In recent years, a number of randomized controlled studies have shown that four traditional exercise therapies play an irreplaceable role in the prevention of T2DM at all levels. Studies have found that Tai Chi can reduce damage to pancreatic islet cells by downregulating the expression of inflammatory cytokines, improving the body's sensitivity to insulin, improving insulin resistance, delaying the occurrence of diabetes complications, and improving the quality of life of patients with T2DM. The application of Baduanjin in high-risk populations for diabetes can delay the time of glucose metabolism disorders, exert good stabilizing effects on blood sugar and glycosylated haemoglobin, and reduce regulatory fluctuations. Wuqinxi exercise can significantly improve the blood rheology of patients with T2DM and improve blood circulation function. Yijinjing can effectively regulate liver and spleen function in patients with T2DM and can help improve blood

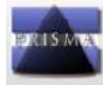

# PRISMA 2009 Checklist

1  
2  
3  
4  
5  
6  
7  
8  
9  
10  
11  
12  
13  
14  
15  
16  
17  
18  
19  
20  
21  
22  
23  
24  
25  
26  
27  
28  
29  
30  
31  
32  
33  
34  
35  
36  
37  
38  
39  
40  
41  
42  
43  
44  
45  
46  
47

|                           |   |                                                                                                                                                                                                                                                                                                                                                                                                                                                                                                                                                                                                                                                                                                                                                                                                                                                                                                                                                                                                                                                                                                                                                                                                                                                                                                                                                                                                                                                                                                                          |     |
|---------------------------|---|--------------------------------------------------------------------------------------------------------------------------------------------------------------------------------------------------------------------------------------------------------------------------------------------------------------------------------------------------------------------------------------------------------------------------------------------------------------------------------------------------------------------------------------------------------------------------------------------------------------------------------------------------------------------------------------------------------------------------------------------------------------------------------------------------------------------------------------------------------------------------------------------------------------------------------------------------------------------------------------------------------------------------------------------------------------------------------------------------------------------------------------------------------------------------------------------------------------------------------------------------------------------------------------------------------------------------------------------------------------------------------------------------------------------------------------------------------------------------------------------------------------------------|-----|
|                           |   | sugar levels.                                                                                                                                                                                                                                                                                                                                                                                                                                                                                                                                                                                                                                                                                                                                                                                                                                                                                                                                                                                                                                                                                                                                                                                                                                                                                                                                                                                                                                                                                                            |     |
| Objectives                | 4 | At present, studies in this area mostly use randomized controlled trials to verify the clinical efficacy of a single traditional exercise therapy on T2DM, and there is no evidence-based evaluation that compares the clinical efficacy of four traditional exercise therapies for T2DM at the same time. Therefore, this study selected four traditional exercise therapies commonly used in clinical practice as the research objects and used the method of network meta-analysis to integrate relevant clinical evidence. After summarizing different interventions in the same body of evidence, a quantitative comprehensive statistical analysis was performed to compare the clinical efficacy of four different traditional Chinese exercise therapies in the treatment of T2DM. Our purpose is to provide a reference for clinical treatment of T2DM to choose more effective exercise intervention therapies.                                                                                                                                                                                                                                                                                                                                                                                                                                                                                                                                                                                                | 3,4 |
| <b>METHODS</b>            |   |                                                                                                                                                                                                                                                                                                                                                                                                                                                                                                                                                                                                                                                                                                                                                                                                                                                                                                                                                                                                                                                                                                                                                                                                                                                                                                                                                                                                                                                                                                                          |     |
| Protocol and registration | 5 | Trial registration number: PROSPERO CRD42020214786                                                                                                                                                                                                                                                                                                                                                                                                                                                                                                                                                                                                                                                                                                                                                                                                                                                                                                                                                                                                                                                                                                                                                                                                                                                                                                                                                                                                                                                                       | 1   |
| Eligibility criteria      | 6 | <p>Eligibility criteria</p> <p>The design of the inclusion and exclusion criteria of this study was based on the five main principles of the Participant-Intervention-Comparator-Outcomes-Study (PICOS) design search principle.</p> <p>Inclusion criteria</p> <p>Types of studies</p> <p>The included literature type was randomized controlled trials (RCT), and there were no restrictions regarding the type of language, whether blinding was used, or the requirements for allocation concealment. Most of the clinical trial reports in this study were from mainland China. As long as the included studies were approved by the local institution, we included the study in the scope of the study and registered it in the international database.</p> <p>Type of participants</p> <p>The patients all had type 2 diabetes, regardless of age, sex, and race. The diagnostic criteria used for diabetes should comply with the "China Type 2 Diabetes Guidelines (2010 Edition)",<sup>i</sup> "China Type 2 Diabetes Prevention Guidelines (2013 Edition)",<sup>ii</sup> "China Type 2 Diabetes Prevention Guidelines (2017 Edition)",<sup>2</sup> "Diagnostic Guidelines for Diabetes Diagnosis and Classification Standards Revised by WHO in 1997"<sup>iii</sup> and "Diagnostic Standards for Diabetes Made by WHO in 1999".</p> <p>Types of interventions and comparators</p> <p>The control group received conventional basic treatment (e.g., hyperglycaemic treatment, health education, voluntary</p> | 4,5 |



# PRISMA 2009 Checklist

|                     |                                                                                                                                                                                                                                                                                                                                                                                                                                                                                                                                                                                                                                                                                                                                                                                                                                                                                                                                                                                                                                                                                                                                                                                                                                                                                                                                                                                                                                                                |     |
|---------------------|----------------------------------------------------------------------------------------------------------------------------------------------------------------------------------------------------------------------------------------------------------------------------------------------------------------------------------------------------------------------------------------------------------------------------------------------------------------------------------------------------------------------------------------------------------------------------------------------------------------------------------------------------------------------------------------------------------------------------------------------------------------------------------------------------------------------------------------------------------------------------------------------------------------------------------------------------------------------------------------------------------------------------------------------------------------------------------------------------------------------------------------------------------------------------------------------------------------------------------------------------------------------------------------------------------------------------------------------------------------------------------------------------------------------------------------------------------------|-----|
|                     | <p>exercise) without exercise intervention. The treatment group was treated with one of the four traditional exercise therapies when the diagnostic criteria, curative effect evaluation criteria, and basic treatment were the same.</p> <p>Types of outcomes</p> <p>The predetermined main outcomes indicators were as follows: (a) blood glucose, including fasting blood glucose (FBG, FPG), 2-h postprandial blood glucose (2hPG, PPG), and glycosylated haemoglobin (GHb, HbA1c); (b) blood lipids, including total cholesterol (TC) and triglycerides (TG), high-density lipoprotein (HDL-C), and low-density lipoprotein (LDL-C).</p> <p>Secondary outcomes indicators included: (a) body mass index BMI; (b) hemorheology indicators (whole blood low shear viscosity, whole blood high shear viscosity, plasma viscosity, haematocrit, erythrocyte sedimentation rate, red blood cell aggregation index, Fib, sICAM, and Ps); (c) quality of life evaluations, including the quality of life specific scale (DSQL) or SF-36 scale evaluations.</p> <p>Exclusion criteria</p> <p>Self-control studies, case reports, review literature, duplicate publication, summary of experiences, animal experiment reasearch, studies with incomplete data, studies with patients that have other diseases, studies with no clear diagnosis or efficacy evaluation standard, studies combined with other therapy that are different from the control group.</p> |     |
| Information sources | <p>7 A computer was used to conduct a comprehensive search for 4 traditional randomized controlled trials (RCTs) for the treatment of type 2 diabetes. The search time was from the establishment of the database to October 30, 2020.</p> <p>Computer databases searched included PubMed, Web of Science, EMBASE, The Cochrane Library, China Knowledge Network (CNKI), Wanfang Data Knowledge Service Platform, VIP.com (VIP), and China Biomedical Literature Database (CBM). Chinese search terms included Tai Chi, Ba Duan Jin, Yi Jin Jing, Wu Qin Xi, traditional exercises, Health Qigong, type 2 diabetes, and random, etc. English search terms included Tai Chi, Ba Duan Jin, Yi Jin Jing, Wu Qin Xi, Traditional Exercises, Health Qigong, Type 2 Diabetes, and Random, etc.</p> <p>In addition, relevant references were tracked in the literature, and the corresponding authors were contacted when a complete report could not be obtained or when documents included incomplete relevant data. The best effort was made to ensure the comprehensiveness of the preliminary search work so as not to lose valuable research data. According to the search modes of different databases, keywords could be combined with free words for a comprehensive search.</p>                                                                                                                                                                             | 5,6 |

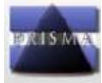

# PRISMA 2009 Checklist

1  
2  
3  
4  
5  
6  
7  
8  
9  
10  
11  
12  
13  
14  
15  
16  
17  
18  
19  
20  
21  
22  
23  
24  
25  
26  
27  
28  
29  
30  
31  
32  
33  
34  
35  
36  
37  
38  
39  
40  
41  
42  
43  
44  
45  
46  
47

|                                    |    |                                                                                                                                                                                                                                                                                                                                                                                                                                                                                                                                                                                                                                                                                                                                                                                                                                          |     |
|------------------------------------|----|------------------------------------------------------------------------------------------------------------------------------------------------------------------------------------------------------------------------------------------------------------------------------------------------------------------------------------------------------------------------------------------------------------------------------------------------------------------------------------------------------------------------------------------------------------------------------------------------------------------------------------------------------------------------------------------------------------------------------------------------------------------------------------------------------------------------------------------|-----|
| Search                             | 8  | Example PubMed search strategies are shown in Table 1, and the terms matched the medical topic titles.                                                                                                                                                                                                                                                                                                                                                                                                                                                                                                                                                                                                                                                                                                                                   | 6   |
| Study selection                    | 9  | According to the abovementioned electronic database search strategy, two researchers searched Chinese and English electronic databases, used Endnote X7 software to search for repeated studies, integrated the literature search results of different databases, established an information database, and downloaded the full texts.                                                                                                                                                                                                                                                                                                                                                                                                                                                                                                    | 7   |
| Data collection process            | 10 | Two researchers conducted preliminary screening independently, extracted data according to a predetermined table, conducted cross-checking and review, recorded the reasons for each excluded study, and invited third-party experts to discuss and research different opinions to make the final decision. The PRISMA flowchart selected for this process is shown in Figure 1.                                                                                                                                                                                                                                                                                                                                                                                                                                                         | 7   |
| Data items                         | 11 | The data extraction content included the basic information of the included literature (including the first author, published journal and year, research topic); the relevant information of the experimental group and the control group in the literature (including the number of cases, disease course, age, intervention measures, treatment course, and outcome indicators); the design type and the quality evaluation information of the included literature (e.g., random method, blind method, allocation concealment, completeness of outcome data, selective reporting results, other sources of bias).                                                                                                                                                                                                                       | 7,8 |
| Risk of bias in individual studies | 12 | According to the quality evaluation standards of the Cochrane System Review Manual, RevMan quality evaluation tools were used to evaluate the methodological quality of the included studies, including random methods, allocation concealment, blinding, completeness of outcome data, selective reporting results, and other sources of bias. Each project was divided into three types of results: high risk, low risk and uncertainty risk. Based on the above descriptions, the two researchers conducted individual induction studies and completed the quality evaluation results of the included literature. If the results were different, third-party experts were invited to help discuss and explain the quality evaluation. Cochrane's standard manual was used for literature quality evaluation and bias risk assessment. | 8   |
| Summary measures                   | 13 | $P < 0.05$ and 95% confidence intervals (95% CI) were used as the standards of significant difference, and the count data used the OR value as the efficacy analysis statistics; the measurement data used the weighted mean difference or the standardized mean difference (mean difference, MD) and indicated that each effect size was expressed with 95% CI.                                                                                                                                                                                                                                                                                                                                                                                                                                                                         | 8,9 |
| Synthesis of results               | 14 | First, the author used RevMan software to analyse the direct comparison results of the literature. Second, for the indirect comparison results, the author used R and ADDIS software for data merging, statistical analysis and NMA                                                                                                                                                                                                                                                                                                                                                                                                                                                                                                                                                                                                      | 8,9 |

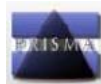

# PRISMA 2009 Checklist

1  
2  
3  
4  
5  
6  
7  
8  
9  
10  
11  
12  
13  
14  
15  
16  
17  
18  
19  
20  
21  
22  
23  
24  
25  
26  
27  
28  
29  
30  
31  
32  
33  
34  
35  
36  
37  
38  
39  
40  
41  
42  
43  
44  
45  
46  
47

while drawing a network relationship diagram and anecdotal sequence diagram of various intervention measures.<sup>iv</sup> The R programming language was used to start the netmeta program and call the Bayesian MCMC (Markov chain-Monte Carlo) algorithm through relevant instructions to realize the network data analysis and mapping of the random effect model data results. ADDIS statistical software uses relevant instructions to call the data results of the random effects model based on the Bayesian MCMC algorithm for prior evaluation and processing.

The heterogeneity was assessed by Cochrane analysis. The I<sup>2</sup> index was used for statistical heterogeneity assessment, and x<sup>2</sup> was used for subgroup analysis based on heterogeneity factors. The clinical and methodological heterogeneity of the included studies was evaluated, and the levels of fit of the fixed-effect model and the random-effect model were compared. In the absence of significant clinical heterogeneity ( $P \geq 0.1$ ,  $I^2 \leq 50\%$ ), a fixed-effects model was used for meta-analysis. If there was significant clinical heterogeneity between the results of each study ( $P < 0.1$ ,  $I^2 > 50\%$ ), the source of the heterogeneity was first analysed, the influence of clinical or methodological heterogeneity was excluded, and the random effects model was used for the meta-analysis. When the data provided by the clinical trial could not be meta-analysed, they were subjected to a descriptive analysis.

Risk of bias across studies

15

Publication bias  
According to the recommendations of the Cochrane Handbook, if more than 10 studies were included, RevMan software was used to analyse potential publication bias. If the graph showed inverted funnel-like symmetry, it indicated that the possibility of publication bias was relatively small. If the funnel chart was asymmetric or incomplete, it indicated that there was a greater possibility of publication bias.

10

Additional analyses

16

Subgroup and sensitivity analyses  
If there is heterogeneity and the data is sufficient, we will try to use subgroup analysis to find out the reasons for the heterogeneity and compare the effects of each group. Data may be compared between patients of different gender, age, course of disease, and treatment time. If the result of the meta-analysis was positive and more than 3 studies were included, R software was used to perform a sensitivity analysis of the statistical results. For each excluded study, the meta-analysis needs was performed again, and the results were compared with the results before exclusion. If there was no substantial change in the comparative analysis, the result was stable. Otherwise, the data results were unstable.

9

## RESULTS

Study selection

17

Give numbers of studies screened, assessed for eligibility, and included in the review, with reasons for exclusions at each stage, ideally with a flow diagram.  
For peer review only: <http://bmjopen.bmj.com/site/about/guidelines.xhtml>

N/A

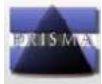

# PRISMA 2009 Checklist

1  
2  
3  
4  
5  
6  
7  
8  
9  
10  
11  
12  
13  
14  
15  
16  
17  
18  
19  
20  
21  
22  
23  
24  
25  
26  
27  
28  
29  
30  
31  
32  
33  
34  
35  
36  
37  
38  
39  
40  
41  
42  
43  
44  
45  
46  
47

|                               |    |                                                                                                                                                                                                                                                                                                                   |     |
|-------------------------------|----|-------------------------------------------------------------------------------------------------------------------------------------------------------------------------------------------------------------------------------------------------------------------------------------------------------------------|-----|
| Study characteristics         | 18 | For each study, present characteristics for which data were extracted (e.g., study size, PICOS, follow-up period) and provide the citations.                                                                                                                                                                      | N/A |
| Risk of bias within studies   | 19 | Present data on risk of bias of each study and, if available, any outcome level assessment (see item 12).                                                                                                                                                                                                         | N/A |
| Results of individual studies | 20 | For all outcomes considered (benefits or harms), present, for each study: (a) simple summary data for each intervention group (b) effect estimates and confidence intervals, ideally with a forest plot.                                                                                                          | N/A |
| Synthesis of results          | 21 | Present results of each meta-analysis done, including confidence intervals and measures of consistency.                                                                                                                                                                                                           | N/A |
| Risk of bias across studies   | 22 | Present results of any assessment of risk of bias across studies (see Item 15).                                                                                                                                                                                                                                   | N/A |
| Additional analysis           | 23 | Give results of additional analyses, if done (e.g., sensitivity or subgroup analyses, meta-regression [see Item 16]).                                                                                                                                                                                             | N/A |
| <b>DISCUSSION</b>             |    |                                                                                                                                                                                                                                                                                                                   |     |
| Summary of evidence           | 24 | Summarize the main findings including the strength of evidence for each main outcome; consider their relevance to key groups (e.g., healthcare providers, users, and policy makers).                                                                                                                              | N/A |
| Limitations                   | 25 | Discuss limitations at study and outcome level (e.g., risk of bias), and at review-level (e.g., incomplete retrieval of identified research, reporting bias).                                                                                                                                                     | N/A |
| Conclusions                   | 26 | Provide a general interpretation of the results in the context of other evidence, and implications for future research.                                                                                                                                                                                           | N/A |
| <b>FUNDING</b>                |    |                                                                                                                                                                                                                                                                                                                   |     |
| Funding                       | 27 | Funding This work was supported by the Preliminary Mechanism and Efficacy Evaluation by the excellent scientific research and innovation teams at Shandong University of Traditional Chinese Medicine in the treatment of major diseases (No. 220316).(Corresponding author Huang Hailiang is the project leader) | 11  |

From: Moher D, Liberati A, Tetzlaff J, Altman DG, The PRISMA Group (2009). Preferred Reporting Items for Systematic Reviews and Meta-Analyses: The PRISMA Statement. PLoS Med 6(7): e1000097. doi:10.1371/journal.pmed1000097

For more information, visit: [www.prisma-statement.org](http://www.prisma-statement.org).

Page 2 of 2

<sup>i</sup> Chinese Diabetes Society. Guidelines for the prevention and control of type 2 diabetes in China (2010 Edition). *Chinese Journal of Diabetes* 2012;20:81-117.

<sup>ii</sup> Chinese Diabetes Society. Guidelines for the prevention and control of type 2 diabetes in China (2013 Edition). *Chinese Journal of Diabetes* 2014;22:2-42.

<sup>iii</sup> Zaiying L, Nanshan Z. *Internal Medicine*. Beijing, China: People's Medical Publishing House 2008

<sup>iv</sup> Chao Z, Feng S, Xiantao Z. R software calls JAGS software to realize network meta-analysis.

*Chinese Journal of Evidence-Based Medicine* 2014;14:241-8.
